# Supplementary material for: Pre-Analytical Sample Quality: Metabolite Ratios as an Intrinsic Marker for Prolonged Room Temperature Exposure of Serum Samples
Source: PLoS One. 2015 Mar 30;10(3):e0121495. doi: 10.1371/journal.pone.0121495 (PMC4379062; doi:10.1371/journal.pone.0121495)
Supplement: S3 Table — (XLS) [file pone.0121495.s005.xls]

## Sheet: Tabelle2
Variable 1	Variable 2	misclassification rate training set	misclasification rate test set
tLyso/tPC	Gln/Ser	0.042	0.048
tLyso/tPCaa	Gln/Ser	0.042	0.048
tLyso/tPCae	Gln/Ser	0.028	0.071
tLyso/tPCae	Phe/PC.aa.C34.3	0.056	0.095
tLyso/tPC		0.056	0
tLyso/tPCaa		0.056	0.024
Phe/PC.aa.C34.3		0.13	0.12
